# Supplementary material for: Clinical, molecular, and resistance features of Listeria monocytogenes in non-perinatal patients with listeriosis: 8-year retrospective data from four tertiary hospitals in Shandong, China
Source: PeerJ journal article supplement (doi:10.7717/peerj.19126), 2025-03-11
Supplement: Raw_data.xlsx [file Raw_data.xlsx]

## Sheet: overall
No.	Sex	Age (year)	serogroup	Gene	ST sequence	Departments	Date	Samples	Clinical diagnosis	Outcomes	Clinical symptoms	Comorbidities	PCT (ng/ml)	crp (mg/l)	Monocyte ratio	EB infection	Neutrophil ratio	wbc	Allergy to penicillin	Duration (days)	Treatment	Reexamination
1	Male	1 year	1/2a	plcA, prfA, InlA, InlJ, Iap, hly, actA, plcB	ST8	Pediatrics	2018-09-12	CSF	septicemia	improved	fever (6 days)	None	0.217	40	7.1	1.39×10* 4	73.8	7.1	No	10	Ceftriaxone, meropenem	negative
2	Male	41 year	4b	plcA, prfA, InlA, InlJ, InlB, Iap, hly, actA, plcB	ST1	Neurosurgery	2016-10-21	blood	septicemia, respiratory failure	death	fever (1 days), unconsciousness, tic of limbs	Symptomatic epilepsy	27.112ng/ml	110.00mg/L	8.1	NA	83.7	22.00×109/L	No	8	Meropenem	CR-aba
3	Male	65 year	1/2a	plcA, prfA, InlA, InlJ, InlB, Iap, hly, actA, plcB	ST7	Neurology	2017-08-15	blood. CSF	septicemia, bacterial meningitis	cure	fever (3 days), headache (2 days), cloudiness(0.5 days)	None	4.724	236	12.1	NA	88.9	15.9	No	20	Meropenem	negative
															12.1	未查	88.9	15.9	否		Ampicillin
4	Male	39 year	1/2a	plcA, prfA, InlA, InlJ, InlB, Iap, hly, actA, plcB	ST8	Neurology	2017-08-13	CSF	bacterial meningitis	cure	fever (20 days), nausea and vomiting (1 week), logagnosia (1 week)	None	0.048	32.5	7.6	NA	73.3	4.8	No	10	Ampicillin	negative
5	female	70 year	1/2a	plcA, prfA, InlA, InlJ, InlB, Iap, hly, actA	ST8	Critical care medicine	2020-09-12	blood	septicemia	death	fever (2 days), unconsciousness (4 hours)	Liver cirrhosis, connective tissue diseases, pneumonia	7.48	204.8	3.9	NA	81.9	11.66	No	5	Cefazoline, ceftazidime, piperacillin-tazobactam	None
6	Male	52 year	1/2b	plcA, prfA, InlA, InlJ, InlB, Iap, hly, actA, plcB	ST87	Neurology	2020-11-29	blood	septicemia, bacterial meningitis, respiratory failure, cerebral hernia	death	fever, headache (1 day)	None	1.363	207	7.6	NA	93.6	24.5	No	4	Ceftriaxone, meropenem, penicillin, vancomycin, sulfamethoxazole	negative
7	Male	45 year	1/2b	plcA, prfA, InlA, InlJ, InlB, Iap	ST3	Hematology	2015-02-05	blood	multiple myeloma	cure	fever	Hypertension, multiple myeloma	4.41	268.78	11.2	NA	90.7	1.8	No	5	Ampicillin, gentamicin	negative
8	female	35 year	1/2a	plcA, prfA, InlA, InlJ, InlB,	ST8	Critical care medicine	2019-08-25	blood	septicemia	cure	fever (2 days), unconsciousness (4 hours)	SLE			7.1		50	10.3		7	Piperacillin-tazobactam	negative
9	female	9 year	1/2a	plcA, prfA, InlA, InlJ, InlB, Iap	ST155	Pediatrics	2019-05-15	CSF	bacterial meningitis	cure	fever (3 days)	None			4.3		89.3	21.09		8	Ampicillin	negative
10	female	8 month	1/2a	plcA, prfA, InlA, InlJ, InlB, Iap, hly, actA, plcB	ST8	Pediatrics	2019-04-15	CSF	septicemia, bacterial meningitis	cure	fever (5 days)	None	0.61	58.58	2.7		89.7	29.57		12	Ceftriaxone, meropenem	negative
11	Male	58 year	1/2a	plcA, prfA, InlA, InlJ, InlB, Iap, hly, actA, plcB	ST8	Critical care medicine	43511	blood CSF	septicemia, bacterial meningitis	cure	fever (4 days), cloudiness(0.5 days)	Hypertension, type 2 DM, coronary heart disease	0.22		6.7		88	12.47		11	Meropenem, vancomycin	negative
	男	58岁				ICU东一	43511															negative
12	Male	68 year	1/2a	plcA, prfA, InlA, InlJ, InlB, Iap, hly, actA, plcB	ST8	Critical care medicine	2017-02-13	blood	septicemia	improved	fever (5 days), unconsciousness, cloudiness (4 hours)	Hypertension, DM	1.3	62.95	10.3		87	4.75		6	Ceftriaxone, meropenem	negative
13	Male	79 year	1/2b	plcA, prfA, InlA, InlJ, Iap, hly, actA, plcB, InlC	ST87	Critical care medicine	43594	blood CSF	septicemia	improved	fever (4 days), headache (3 days), cloudiness (0.5 days)	Hypertension, DM, COPD	8.22		3.1		94.1	12.66		9	Ceftriaxone, meropenem, sulfamethoxazole	negative
	男	79岁				ICU西	43594
14	female	56 year	1/2a	plcA, prfA, InlA, InlJ, InlB, plcA, prfA, InlA, InlJ, Iap, hly, actA	ST8	Oncology	2017-08-21	blood	septicemia	cure	fever (3 days)	Rectal cancer, breast cancer	4	96.9	8.4	NA	89.1	14.7		7	Ceftriaxone, ampicillin	negative
15	Male	56 year	1/2b	plcA, prfA, InlA, InlJ, Iap, hly, actA	ST87	Gastroenterology	2014-06-05	blood	septicemia	improved	fever (5 days), throat pain (3 days)	DM, hepatitis E	28.53	107.1	0.6	IgG：126.8	97.5	2.5		1	Linezolid, biapenem	negative
16	female	80 year	1/2a	plcA, prfA, InlA, InlJ, InlB, Iap, hly, actA, plcB, InlC	ST7	Osteoarthropathy	2015-09-17	joint fluid	Infection caused by right knee prosthesis	improved	aggravated postoperative pain	None	0.05	50.7	7.1	NA	56.4	6.5		10	Meropenem, vancomycin, amikacin	negative
17	female	66 year	1/2a	plcA, prfA, InlA, InlJ, InlB,	ST8	Neurology	2020-06-20	CSF	bacterial meningitis	cure	fever (2 days), unconsciousness (6 hours)	Cerebral infarction, hypertension	0.25	>200	4	EBV VCAigM(-)	92	10.77		11	Meropenem	negative
18	female	68 year	1/2b	plcA, prfA, InlA, InlJ	ST5	Oncology	2019-08-10	blood	non-hodgkin's lymphoma	cure	fever, fatigue 3 days	Non-Hodgkin’s lymphoma	0.171	36.92	4.4	NA	92.5	6.15	No	13	Piperacillin-tazobactam	negative
19	female	51 year	1/2a	plcA, prfA, InlA, InlJ, InlB, Iap, hly, actA, plcB	ST8	Neurology	2019-08-17	CSF	bacterial meningitis	cure	fever (2 days), unconsciousness (4 hours)	Hypertension	未查	未查	1.8	NA	91.3	12.28	No	8	Ampicillin	negative
20	female	75 year	1/2a	plcA, prfA, InlA, InlJ, InlB,	ST121	Gastroenterology	2020-12-12	ascites	liver cirrhosis	death	stomachache (~0.5 month),	Hepatitis B	2.3	250	3.5	NA	92.5	11.3	No	6	Imipenem-cilastatin	negative
21	female	74 year	1/2a	plcA, prfA, InlA, InlJ, InlB, Iap, hly, actA, plcB, InlC	ST155	Neurology	2021-01-22	blood CSF	bacterial meningitis, respiratory failure	death	fever, weakness (unconfirmed)	Coronary atherosclerosis	7.71	278.89	3.6	NA	94.8	13.4	No	3	Ceftriaxone, penicillin	negative
	？	74岁				神经内科二病区	44221						8.93	305.97	1.3	未查	98.7	14.1	否
22	Male	54 year	1/2b	plcA, prfA, InlA, InlJ, InlB,	ST87	Critical care medicine	2021/07/15	blood	septic shock	death	fever and diarrhea 2 days, T39.0℃	Hypopharyngeal carcinoma	＞100	＞240	7.4	NA	62.4	5.13	No	1	Imipenem-cilastatin	None
23	Male	11 month	1/2a	plcA, prfA, InlA, InlJ, Iap, hly, actA, plcB, InlC	ST8	Pediatrics	2022-03-07	CSF	septicemia, bacterial meningitis	improved	fever (4 days), 39.4℃	None	0.053	1.49	20.4	NA	38.1	17.19	No	13	Ceftizoxime, meropenem, vancomycin, penicillin, linezolid	negative
24	female	56 year	1/2a	plcA, prfA, InlA, InlJ, InlB, Iap, hly, actA, plcB, InlC	ST8	Critical care medicine	2021/03/04	blood	septicemia, bacterial meningitis	withdrawing treatment	fever (3 days), unconsciousness (9 hours)	SLE, CRF, lupus nephritis, hypertension, cerebral infarction, hypothyroidism	9.08	161	5.8	NA	85.9	13.2	No	0	None	None
25	female	60 year	1/2a	plcA, prfA, InlA, InlJ, InlB,	ST8	Hematology	2022/05/24	blood	septicemia	improved	fever (38.2℃), acute lymphocytic leukemia, hypocytosis	Leukemia, hypertension, type 2 DM, pulmonary nodule, fatty liver, renal cyst	0.108	＞200	3	NA	18.2	0.66	No	7	Meropenem, linezolid	None
26	female	82 year	1/2a	plcA, prfA, InlA, InlJ, InlB,	ST7	Gastroenterology	2022/11/03	blood	Infected abdominal aortic aneurysm	improved	stomachache (~1 month), aggravated 12 days	Hypertension, type 2 DM	0.06	17.2	4.3	NA	83.8	8.95	No	10	Cefoperazone-sulbactam, amoxicillin-clavulanate, minocycline	negative
27	female	3 year	1/2b	plcA, prfA, InlA, InlJ, InlB,	ST169	Pediatrics	2018-06-06	CSF	septicemia	improved	intermittent fever (7 days; 39.8℃)	None	0.158	3	4.4	＜5.00E+02 copy/mL	68	14.4	No	11	Ceftazidime, azithromycin, penicillin, meropenem	negative
							人数
							5
							3
							8
							11

## Sheet: serogroup 
	serogroup	Gene	ST sequence	dapE	lhkA	ldh	cat	dat	bglA	abcZ
1	1/2a	plcA，prfA，InlA，InlJ，Iap，hly，actA，plcB	ST8	9	1	3	2	5	6	5
2	4b	plcA，prfA，InlA，InlJ，InlB，Iap，hly，actA，plcB	ST1	1	3	1	1	3	1	3
3	1/2a	plcA，prfA，InlA，InlJ，InlB，Iap，hly，actA，plcB	ST7	7	1	2	5	6	8	5
4	1/2a	plcA，prfA，InlA，InlJ，InlB，Iap，hly，actA，plcB	ST3	3	5	1	4	2	4	4
5	1/2a	plcA，prfA，InlA，InlJ，InlB，Iap，hly，actA	ST8	9	1	3	2	5	6	5
6	1/2b	plcA，prfA，InlA，InlJ，InlB，Iap，hly，actA，plcB	ST87	14	4	39	4	3	1	12
7	1/2b	plcA，prfA，InlA，InlJ，InlB，Iap	ST3	3	5	1	4	2	4	4
8	1/2a	plcA，prfA，InlA，InlJ，InlB，	ST3	3	5	1	4	2	4	4
9	1/2a	plcA，prfA，InlA，InlJ，InlB，Iap	ST155	7	1	2	16	5	10	7
10	1/2a	plcA，prfA，InlA，InlJ，InlB，Iap，hly，actA，plcB	ST8	9	1	3	2	5	6	5
11	1/2a	plcA，prfA，InlA，InlJ，InlB，Iap，hly，actA，plcB	ST8	9	1	3	2	5	6	5
12	1/2a	plcA，prfA，InlA，InlJ，InlB，Iap，hly，actA，plcB	ST1	1	3	1	1	3	1	3
13	1/2b	plcA，prfA，InlA，InlJ，Iap，hly，actA，plcB，InlC	ST87	14	4	39	4	3	1	12
14	1/2a	plcA，prfA，InlA，InlJ，InlB，plcA，prfA，InlA，InlJ，Iap，hly，actA	ST8	9	1	3	2	5	6	5
15	1/2b	plcA，prfA，InlA，InlJ，Iap，hly，actA	ST87	14	4	39	4	3	1	12
16	1/2a	plcA，prfA，InlA，InlJ，InlB，Iap，hly，actA，plcB，InlC	ST7	7	1	2	5	6	8	5
17	1/2a	plcA，prfA，InlA，InlJ，InlB，	ST8	9	1	3	2	5	6	5
18	1/2b	plcA，prfA，InlA，InlJ	ST5
19	1/2a	plcA，prfA，InlA，InlJ，InlB，Iap，hly，actA，plcB	ST8	9	1	3	2	5	6	5
20	1/2a	plcA，prfA，InlA，InlJ，InlB，	ST121
21	1/2a	plcA，prfA，InlA，InlJ，InlB，Iap，hly，actA，plcB，InlC	ST155	7	1	2	16	5	10	7
22	1/2b	plcA，prfA，InlA，InlJ，InlB，	ST87	14	4	39	4	3	1	12
23	1/2a	plcA，prfA，InlA，InlJ，Iap，hly，actA，plcB，InlC	ST8	9	1	3	2	5	6	5
24	1/2a	plcA，prfA，InlA，InlJ，InlB，Iap，hly，actA，plcB，InlC	ST8	9	1	3	2	5	6	5
25	1/2a	plcA，prfA，InlA，InlJ，InlB，	ST8	9	1	3	2	5	6	5
26	1/2a	plcA，prfA，InlA，InlJ，InlB，	ST7	7	1	2	5	6	8	5
27	1/2b	plcA，prfA，InlA，InlJ,InlB，	ST169
